# Supplementary material for: A smartphone “app”-delivered randomized factorial trial targeting physical activity in adults
Source: Springer Nature journal article supplement (doi:10.1007/s10865-017-9838-y), 2017-03-02
Supplement: MOESM1 [file 12105972]

| **Action** | **Group** | **Program Points (*pp*)** |
| --- | --- | --- |
| Log Aerobic Activity (limit 3/day) | A, B | 10 |
| Log Non-Aerobic Activity (limit 3/day) | A, B | 10 |
| Log “Other Activity” (limit 3/day) | A, B | 5 |
| Log Activity (first two) | C, D | 10 |
| Log Activity (additional) | C, D | 5 |
| View Weekly Educational Video (first time) | A, B, C, D | 10 |
| Answer Weekly Quiz Question (once) | A, B, C, D | 5 |
| Achieve Short Term Goal | A | where constant = 5 |
| Achieve Long Term Goal | A | where constant = 10 |

*Electronic Supplemental Material Table 1: Allocation of program points (pp)*

| **Goal Type** | **Frequency (Min - Max, Recommended; day) *Conditions*** | **Duration (Min - Max, Recommended; min)**  ***Conditions*** |
| --- | --- | --- |
| Initial | Aerobic: 1 - 7, 3  Non-Aerobic: 1-7, 2 | 1-60, 15  1-60, 15 |
| No Success | PF 1day, PF  *1 Minimum 5*  *Minimum Recommended 5*  *3 Maximum 7* | (PD-15%) – (PD+15%), PD  *10 Minimum*  *Maximum 10 or PD + 5* |
| Success  First 4 Weeks | LM, LM+1, LM  *1 Minimum 5*  *2 Maximum 7*  *Recommended 5* | LM+15%, LM+50%, LM+35%  *Set maximum to median duration of successfully met goals, unless that is less than LM+50%* |
| Success  Last 8 Weeks | LM, LM+2, LM+1  *1 Minimum 5*  *2 Maximum 7*  *Recommended 5* | LM+15%, LM+35%, LM+25%  *Set maximum to median duration of successfully met goals, unless that is less than LM+35%* |

*Electronic Supplemental Material Table 2: Goal setting ruleset. Note: PF = previous goal frequency; PD = previous goal duration; LM = last met goal.*


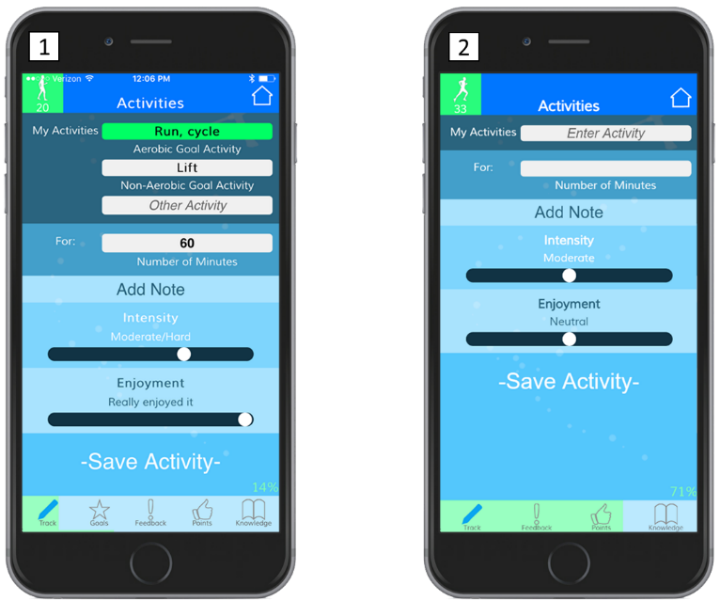


*Electronic Supplemental Material Figure 1: Screenshots for in-app tracking. Note: 1=Tracking screen for groups A & B; 2=Tracking screen for groups C &D*

*
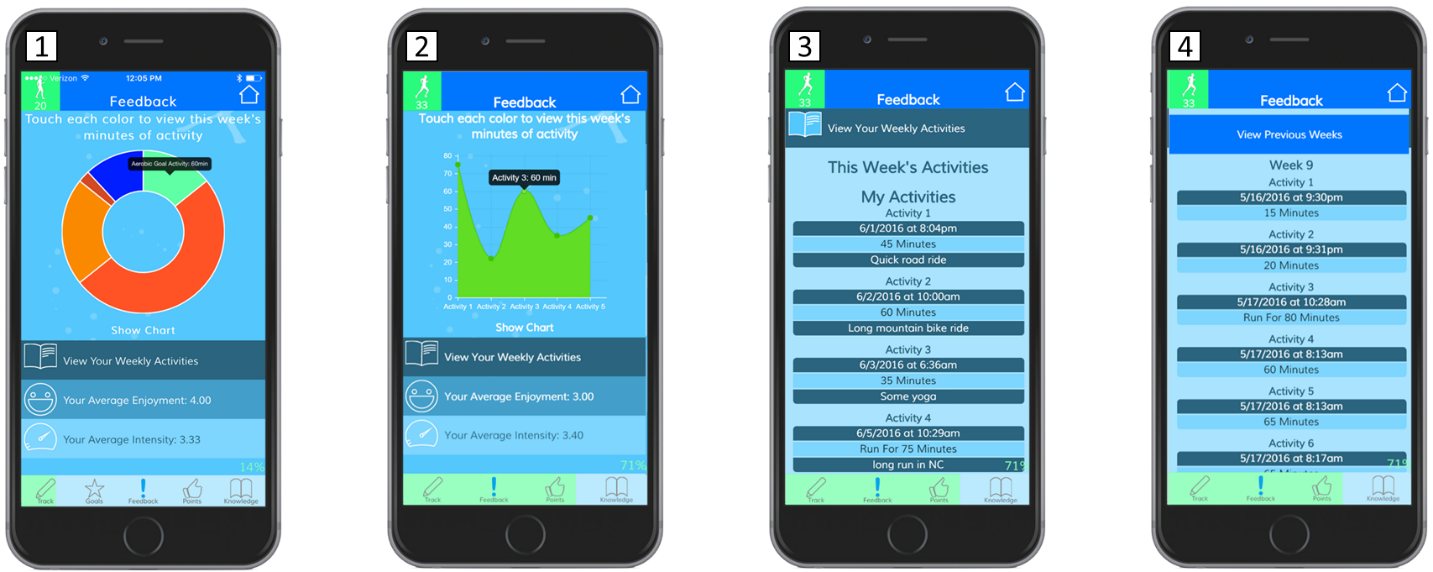
*

*Electronic Supplemental Material Figure 2: Screen shots for in-app feedback. Note: 1=Example feedback screen for groups A & B; 2=Example feedback screen for groups C & D; 3=Example weekly diary; 4=Example history diary.*

*
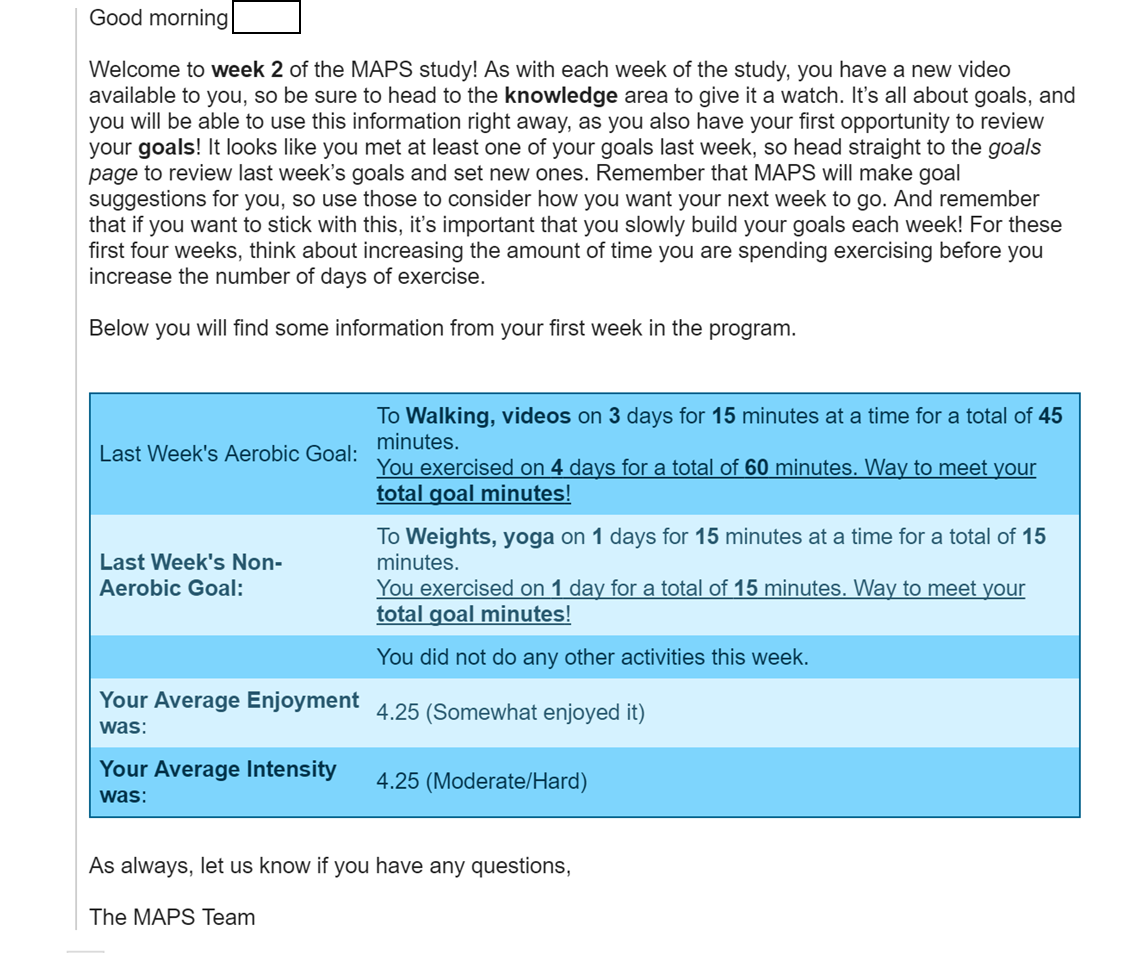
*

*Electronic Supplemental Material Figure 3: Example automated feedback email.*

*
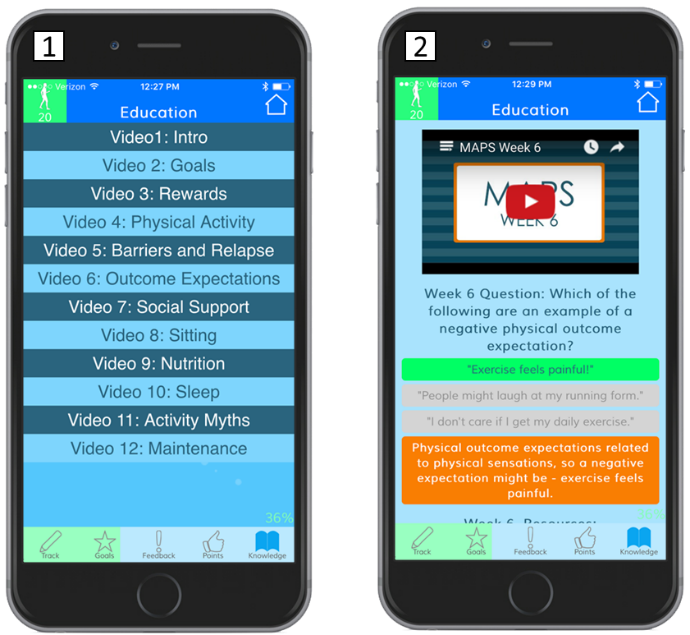
*

*Electronic Supplemental Material Figure 4: Screenshots for the knowledge feature. Note: 1=Screenshot showing all education modules during the 12th week of the program; 2=Screenshot depicting the outcome expectations video and answered quiz question.*

*
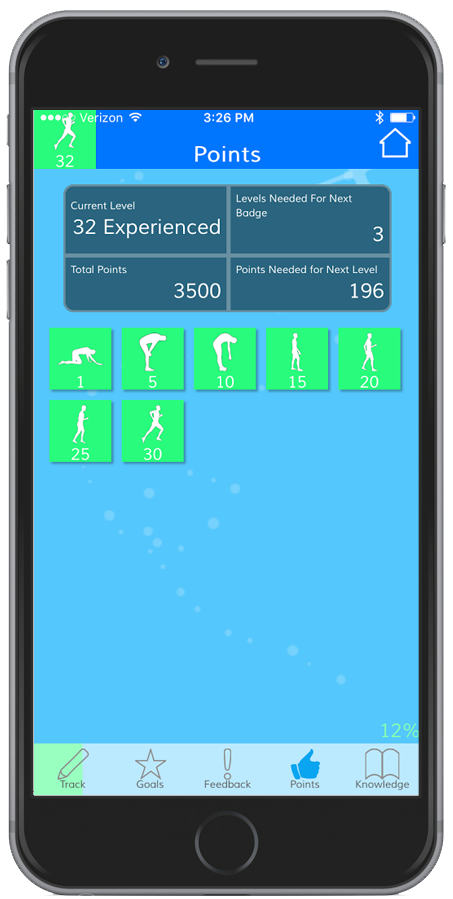
*

*Electronic Supplemental Material Figure 5: Example “Points” screen with badges*

*
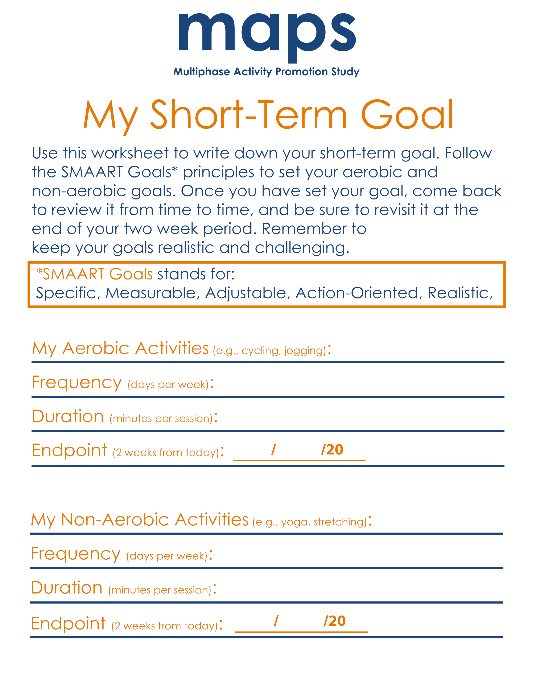
*

*Electronic Supplemental Material Figure 6: Example short-term goal worksheet from the goal-setting handbook used by groups C & D*

*
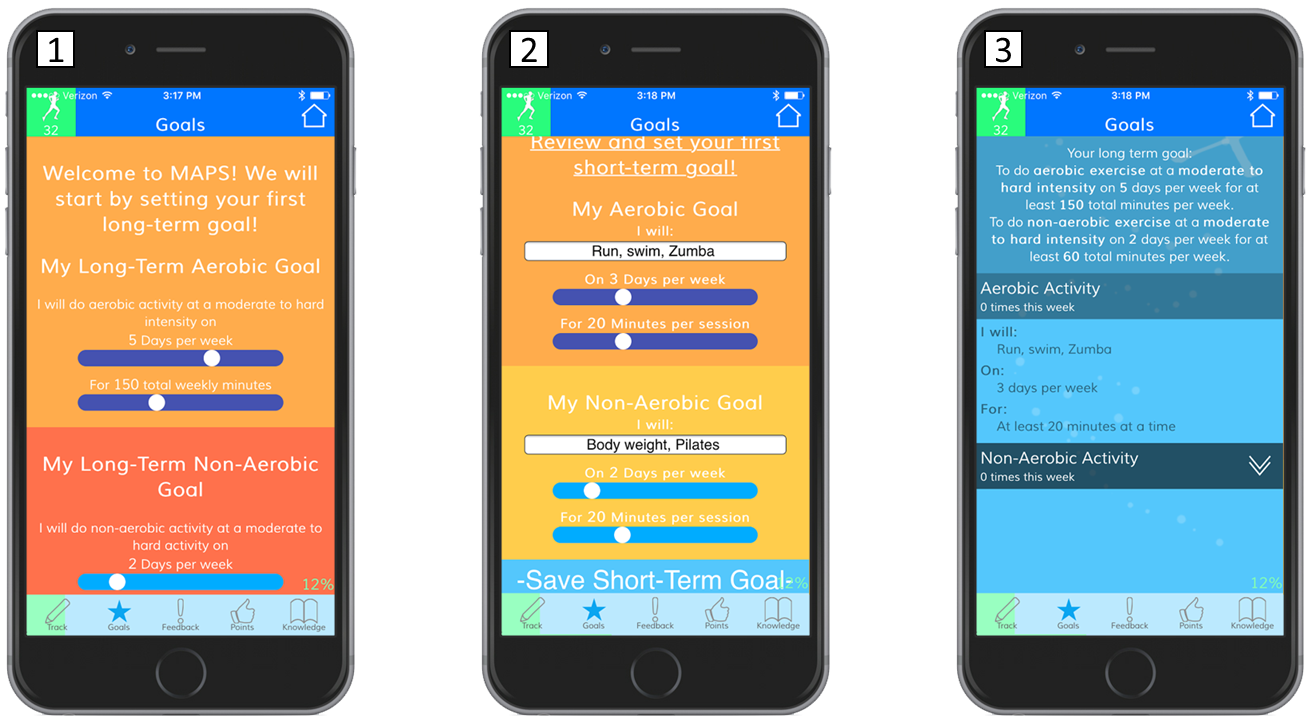
*

*Electronic Supplemental Material Figure 7: Example goal-setting screens for those in groups A or B. Note: 1=Example distal goal screen; 2=Example short term goal screen; 3=Example goal monitoring screen.*

*
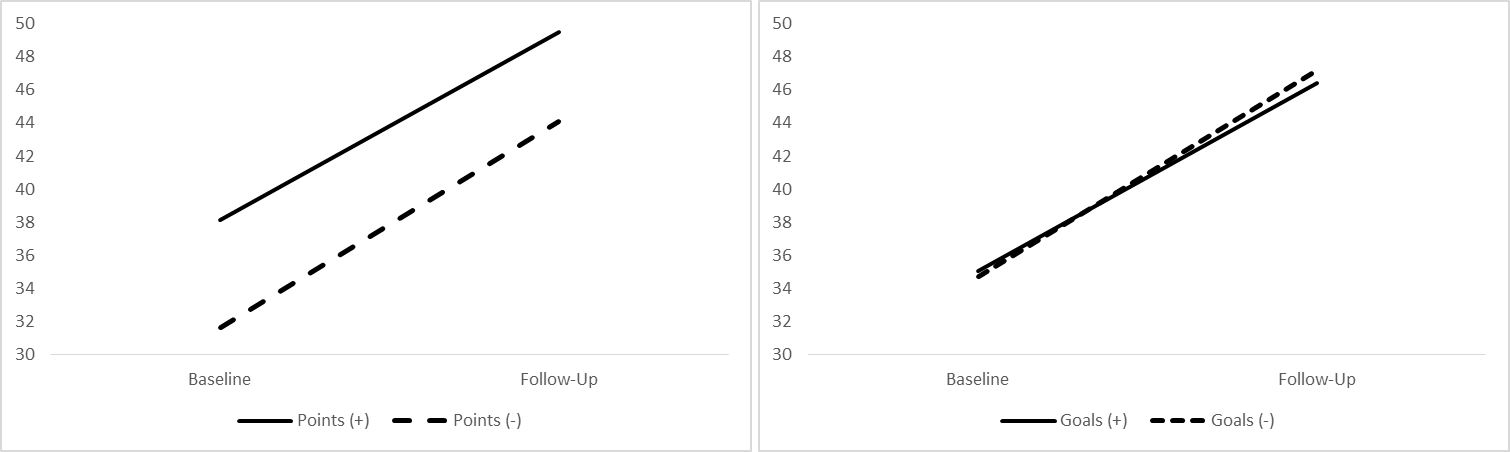
*

*Electronic Supplemental Material Figure 8: Mean change in daily minutes of MVPA (adjusted for education) from baseline to week 12. The left graph compares those with and without the points module, the right graph compares those with and without the goal-setting module.*

*
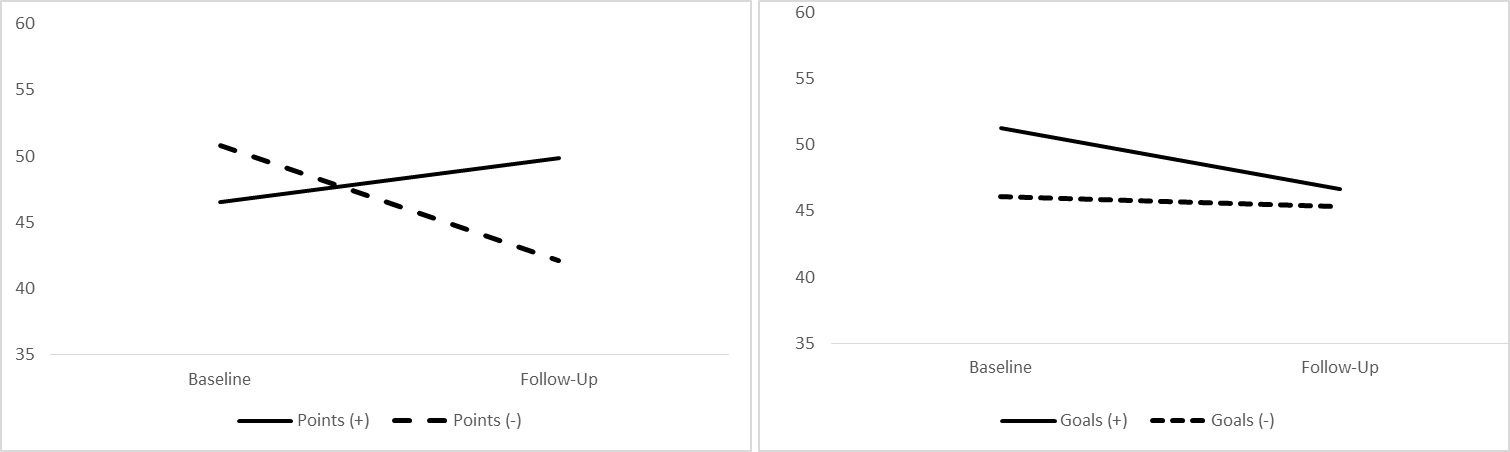
*

*Electronic Supplemental Material Figure 9: Mean change in barriers self-efficacy from baseline to week 12. The left graph compares those with and without the points module, the right graph compares those with and without the goal-setting module.*

*
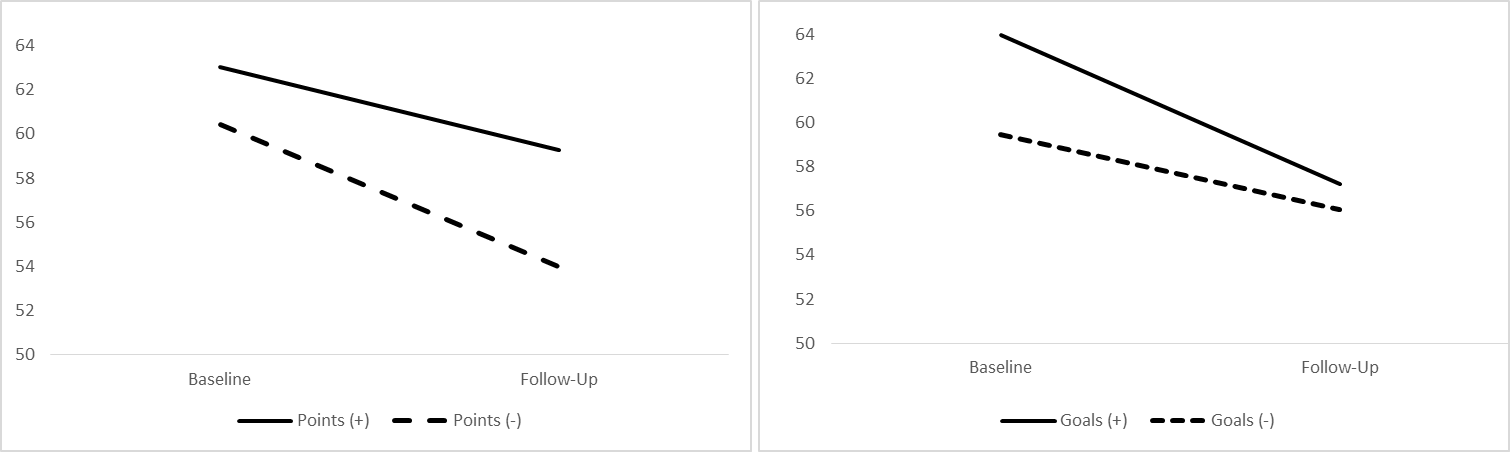
*

*Electronic Supplemental Material Figure 10: Mean change in exercise self-efficacy (adjusted for gender) from baseline to week 12. The left graph compares those with and without the points module, the right graph compares those with and without the goal-setting module.*

*
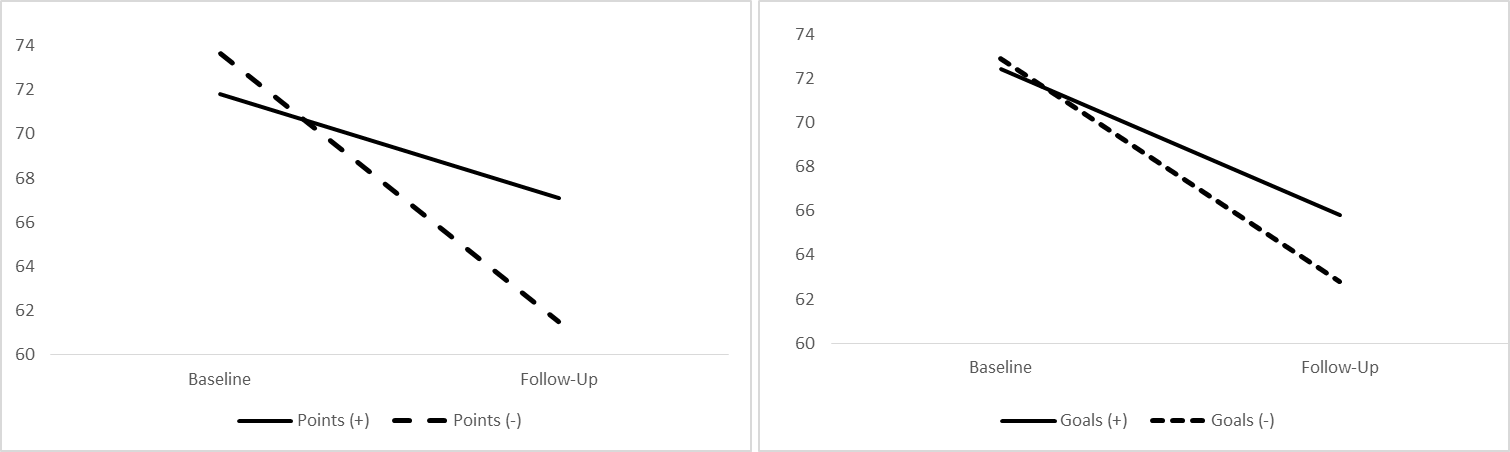
*

*Electronic Supplemental Material Figure 11: Mean change in lifestyle self-efficacy from baseline to week 12. The left graph compares those with and without the points module, the right graph compares those with and without the goal-setting module.*

*
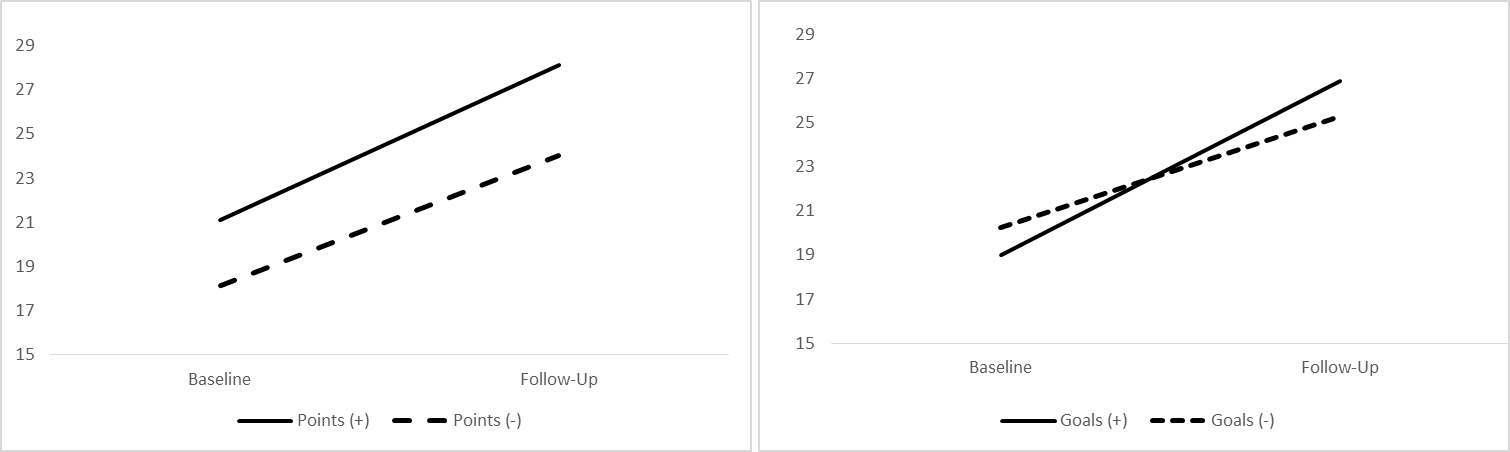
*

*Electronic Supplemental Material Figure 12: Mean change in exercise goal setting (adjusted for race) from baseline to week 12. The left graph compares those with and without the points module, the right graph compares those with and without the goal-setting module.*

*
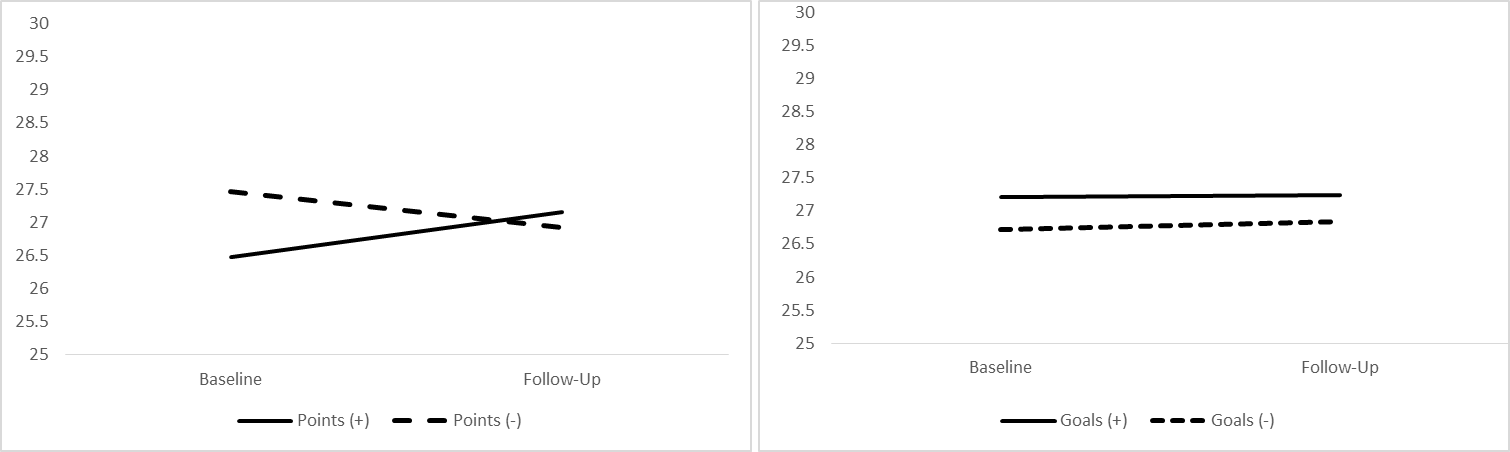
*

*Electronic Supplemental Material Figure 13: Mean change in physical outcome expectations for exercise from baseline to week 12. The left graph compares those with and without the points module, the right graph compares those with and without the goal-setting module.*

*
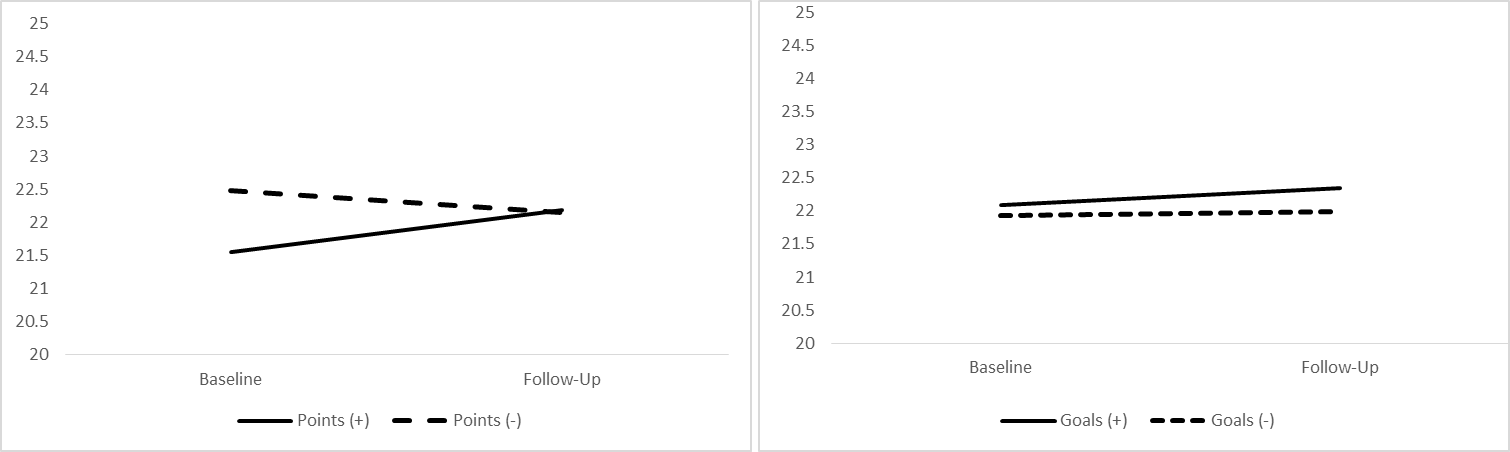
*

*Electronic Supplemental Material Figure 14: Mean change in self-evaluative outcome expectations for exercise from baseline to week 12. The left graph compares those with and without the points module, the right graph compares those with and without the goal-setting module.*

*
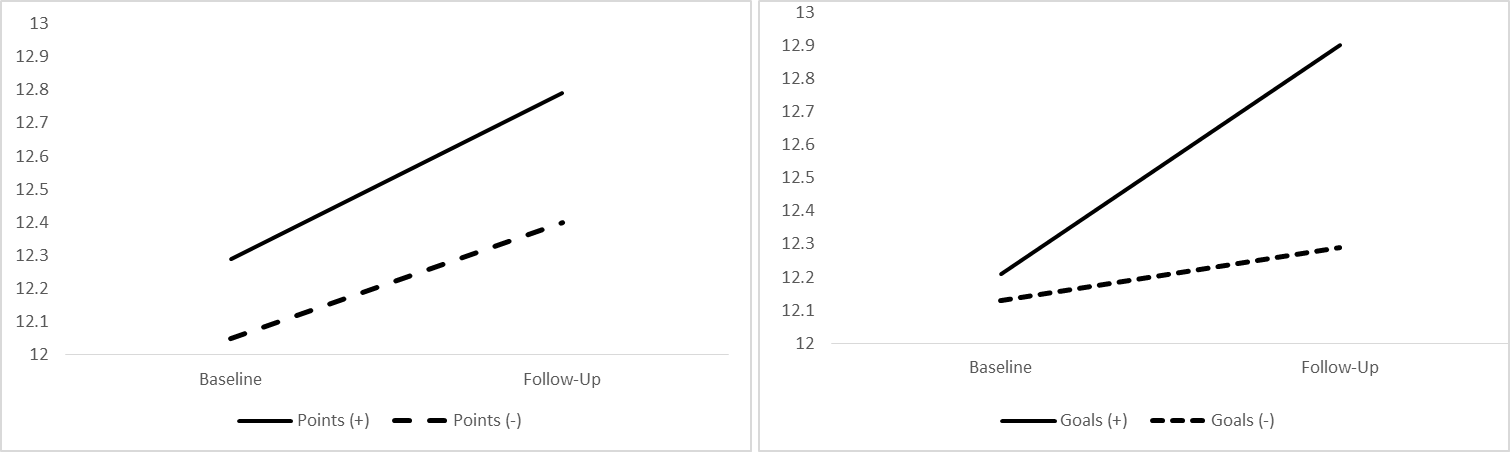
*

*Electronic Supplemental Material Figure 15: Mean change in social outcome expectations for exercise (adjusted for gender and income) from baseline to week 12. The left graph compares those with and without the points module, the right graph compares those with and without the goal-setting module.*

*
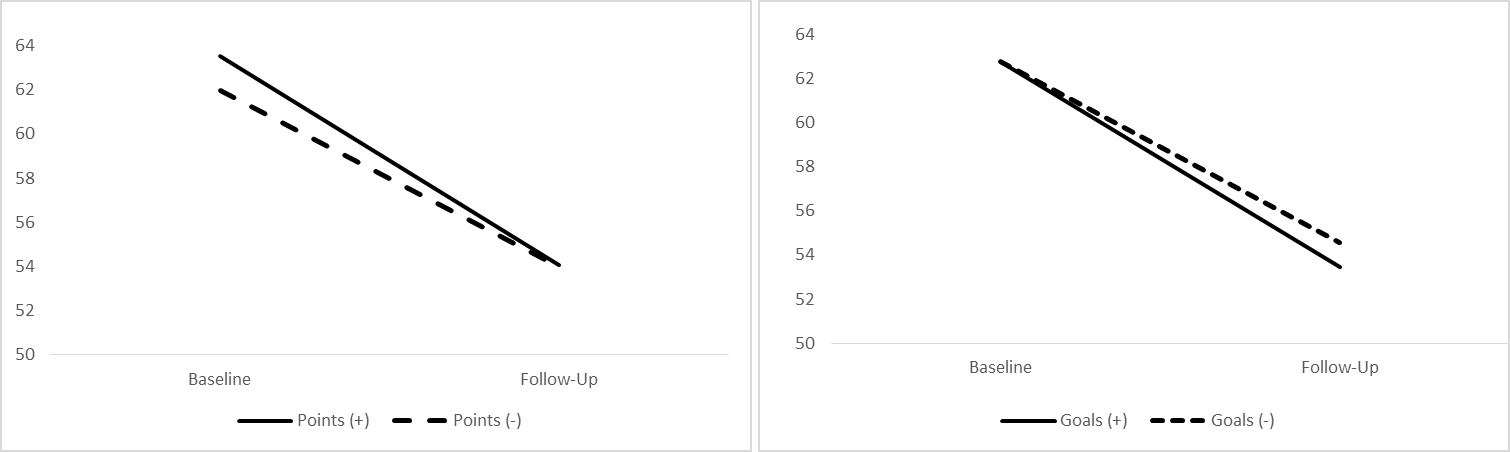
*

*Electronic Supplemental Material Figure 16: Mean change in perceived barriers to exercise (adjusted for gender) from baseline to week 12. The left graph compares those with and without the points module, the right graph compares those with and without the goal-setting module.*

*
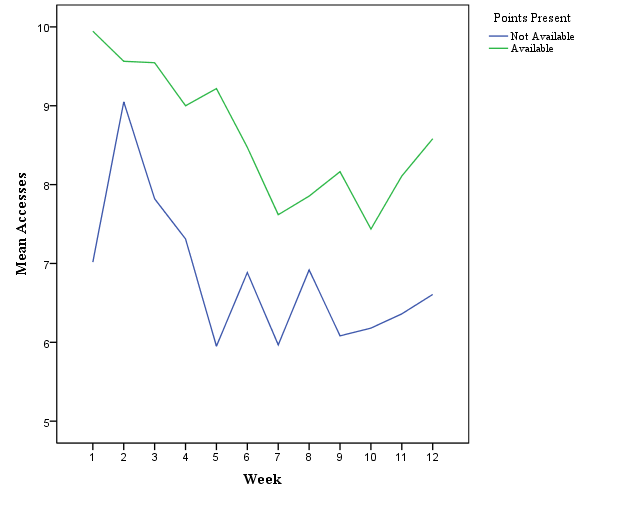

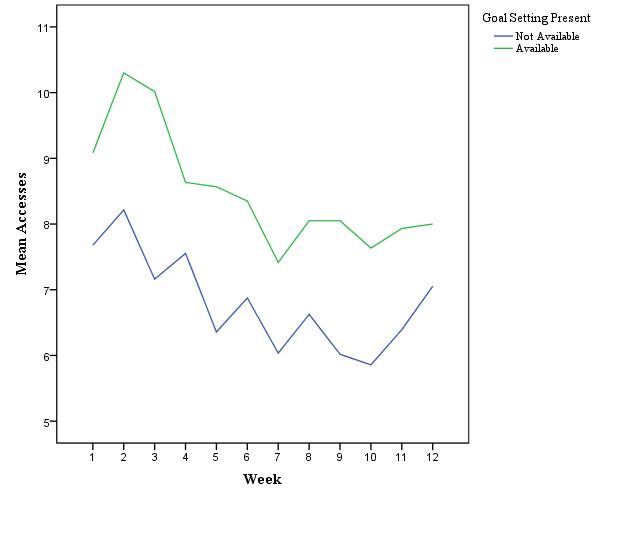
*

*Electronic Supplemental Material Figure 17. Application accesses across the 12 week program. Note: The graph on the left depicts accesses per week for those with and without access to in-app goal setting; the graph on the right depicts accesses per week for those with and without access to points-based feedback.*
